# Supplementary material for: Troglitazone suppresses glutamine metabolism through a PPAR-independent mechanism
Source: publisher site journal article supplement (doi:10.1515/hsz-2014-0307), 2015-04-15
Supplement: Supplementary file 1 [file hsz-2014-0307_Supp_Data_Revised.doc]

**Supplemental Data**

**Supplemental Figure 1. Glutamine withdrawal significantly reduces cell number of H460, HeLa 229, and TKO MEF cells.** Cells were incubated in complete medium (Glucose + Glutamine) or glutamine-deficient medium (Glucose - Glutamine) for 48 hours. Viable cell number in the TKO MEF, HeLa 229 and H460 cells was assessed using trypan blue staining and hemocytometer enumeration. Data are presented as viable cell number and shown as the mean + s.d. from three independent experiments. * *p* < 0.05 compared to +GLN for each cell type.

**Supplemental Figure 2. Troglitazone suppresses glutamine incorporation into aspartate.**  Shown are representative 2-D NMR spectra of TOCSY cross-peaks corresponding to aspartate C2-C3 and 13C satellites in H460 cells treated with varying concentrations of troglitazone for 48 hours. The pattern indicates a mixture of fully labeled aspartate via the first turn of the Krebs cycle, and aspartate that shows the second turn of the Krebs cycle after condensation of oxaloacetate (OAA) with unlabeled acetyl-CoA. The boxes connect the 13C satellite peaks of aspartate, consistent with the direct production of aspartate from glutamine through oxaloacetate metabolism. The central peak denoted by 12C corresponds to unlabeled aspartate.

**Supplemental Figure 3. Troglitazone suppresses steady-state ATP levels in HeLa 229 and TKO MEF cells.** Steady-state ATP levels were determined for TKO MEF and HeLa 229 cells in response to treatment with varying concentrations of troglitazone for 48 hours as described in the *Materials and Methods*. Data are presented as relative [ATP] where vehicle is 1.0, and shown as the mean + s.d. from three independent experiments. * *p* < 0.05 compared to vehicle control for each cell type.

**Supplemental Figure 4. Troglitazone decreases cell number in HeLa 229 and TKO MEF cells.** Viable cell number was determined for TKO MEF and HeLa 229 cells in response to treatment with varying concentrations of troglitazone for 48 hours as described in the *Materials and Methods*. Data are presented as viable cell number where vehicle is 100, and shown as the mean + s.d. from three independent experiments. * *p* < 0.05 compared to vehicle control for each cell type.

**Supplemental Figure 5. Transient transfection of targeted siRNA species decreases protein expression of PPAR or PPAR.** H460, HeLa 229, and TKO MEF cells were transfected with siRNAs directed against either PPAR **(A)** or PPAR **(B)** and protein expression for PPAR, PPAR, and -actin were determined as described in the *Materials and Methods*.

**Supplemental Figure 6. siRNAs directed against PPAR and PPAR are unable to rescue glutamine uptake and viable cell number in HeLa 229 cells treated with troglitazone.** HeLa 229 cells transfected with siRNAs directed against either PPAR **(A)** or PPAR **(B)** were incubated with varying concentrations of troglitazone for 48 hours. Glutamine uptake in the HeLa 229 cells was assayed by 14C-glutamine labeling. Data are presented as percent of vehicle and shown as the mean + s.d. from three independent experiments. Viable cell number was determined by trypan blue staining and hemocytometer enumeration. Data are presented as percent of vehicle and shown as the mean + s.d. from three independent experiments.Statistical analysis on both glutamine uptake and viable cell number was performed comparing each group within a specific treatment concentration. The lack of asterisks indicates no significant difference (* *p* < 0.05).

**Supplemental Figure 7. siRNAs directed against PPAR and PPAR are unable to rescue glutamine uptake and viable cell number in TKO MEF cells treated with troglitazone.** TKO MEF cells transfected with siRNAs directed against either PPAR **(A)** or PPAR **(B)** were incubated with varying concentrations of troglitazone for 48 hours. Glutamine uptake in the TKO MEF cells was assayed by 14C-glutamine labeling. Data are presented as percent of vehicle and shown as the mean + s.d. from three independent experiments. Viable cell number was determined using trypan blue staining and hemocytometer enumeration. Data are presented as percent of vehicle and shown as the mean + s.d. from three independent experiments.Statistical analysis on both glutamine uptake and viable cell number was performed comparing each group within a specific treatment concentration. The lack of asterisks indicates no significant difference (* *p* < 0.05).

**Supplemental Figure 8. Inhibition of PPAR by small-molecule antagonist, GW9662, fails to rescue glutamine uptake and cell number in cells incubated with troglitazone.** Glutamine uptake **(A)** or viable cell number **(B)** was determined in H460, HeLa229, and TKO MEFs treated in the presence or absence of GW9662 (10M) for 48 hours. H460 **(C&D)**, HeLa 229 **(E&F)**, and TKO MEFs **(G&H)** were treated with varying concentrations of troglitazone with or without GW9662 (10M) for 48 hours. Glutamine uptake **(C,E,&G)** was assayed by 14C-glutamine labeling. Data are presented as percent of vehicle and shown as the mean + s.d. from three independent experiments. Viable cell number **(D,F,&H)** was determined using trypan blue staining and hemocytometer enumeration. Data are represented as percent of vehicle and shown as the mean + s.d. from three independent experiments.Statistical analysis on both glutamine uptake and viable cell number was performed comparing each group within a specific cell line (A-B) or treatment concentration (C-H). The lack of asterisks indicates no significant difference (* *p* < 0.05).

**Supplemental Figure 9. Expression of T58A mutant c-Myc is unable to rescue c-Myc expression.** H460 cells stably expressing T58A c-Myc were generated as described in the *Supplemental Materials and Methods*. **(A)** Expression of c-Myc in H460 cells stably transfected with Sham or T58A c-Myc expression plasmids. **(B)** Expression of p-c-Myc (S62), p-c-Myc (T58), total c-Myc, and -actin after 48 hour treatment with varying concentrations of troglitazone. Shown are representative images from three separate experiments.

**Supplemental Figure 10. Expression of T58A mutant c-Myc is unable to rescue glutamine uptake, steady-state ATP levels, or cell number in response to troglitazone treatment.** H460 cells stably expressing T58A c-Myc were generated as described in the *Supplemental Materials and Methods*. **(A)** Glutamine uptake, **(B)** steady-state ATP levels, and **(C)** viable cell number was determined in either Sham or T58A c-Myc expressing H460 cells as described in the *Materials and Methods*. Data are presented as relative ATP concentrations where vehicle is set to 1 or percent vehicle and shown as the mean + s.d. from three independent experiments. Statistical analysis on both glutamine uptake and viable cell number was performed comparing each group within a specific treatment concentration. The lack of asterisks indicates no significant difference (* *p* < 0.05).

**Supplemental Materials and Methods**

Sham or c-Myc (T58A) encoding retroviral particles were a kind gift from Dr. Levi Beverly. Seventy-two hours post infection, H460 cells were sorted for GFP fluorescence within the James Graham Brown Cancer Center’s flow cytometry core facility. Cells were maintained in complete medium until experimental analysis and c-Myc (T58A) expression was continually verified via GFP-fluorescent microscopy .
